# Supplementary material
Source: ML conference proceedings conference paper supplement (https://openreview.net/forum?id=m55I8B1DGs)
Supplement: supplementary_material [file Formatting_Instructions_for_ICLR_2026_Conference_Submissions__appendix.pdf › Appendix/Formatting_Instructions_for_ICLR_2026_Conference_Submissions__appendix.pdf]

## A ADDITIONAL VISUALIZATION OF SEGMENTATION

Figure 1 displays more segmentation results generated by our model and other baselines on the MoNuSeg dataset. Notably, our method produces segmentation results with fewer errors and more resemblance to the ground truth, owing to its capacity to effectively integrate multi-scale image features with semantic information hidden in medical text. Figure 2 displays more segmentation results on the QaTa-COVID19 dataset. Figure 3 displays more segmentation results on the MosMedData+ dataset. Evidently, the proposed approach yields the most accurate segmentation results in scenarios involving subtle or fine-grained lesion areas.

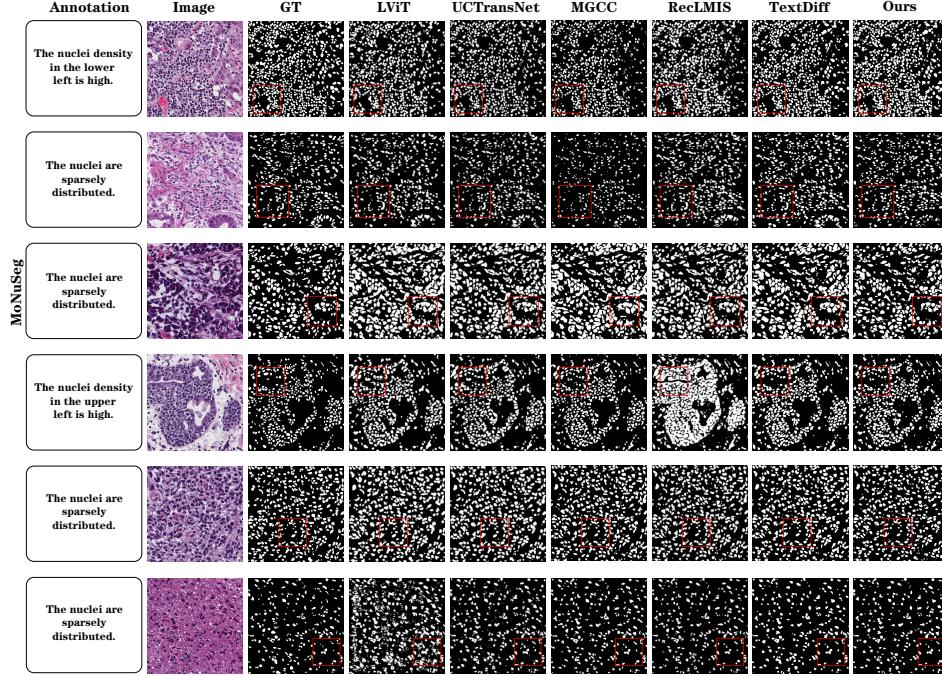

Figure 1: Visual segmentation comparisons with other methods on the MoNuSeg dataset.

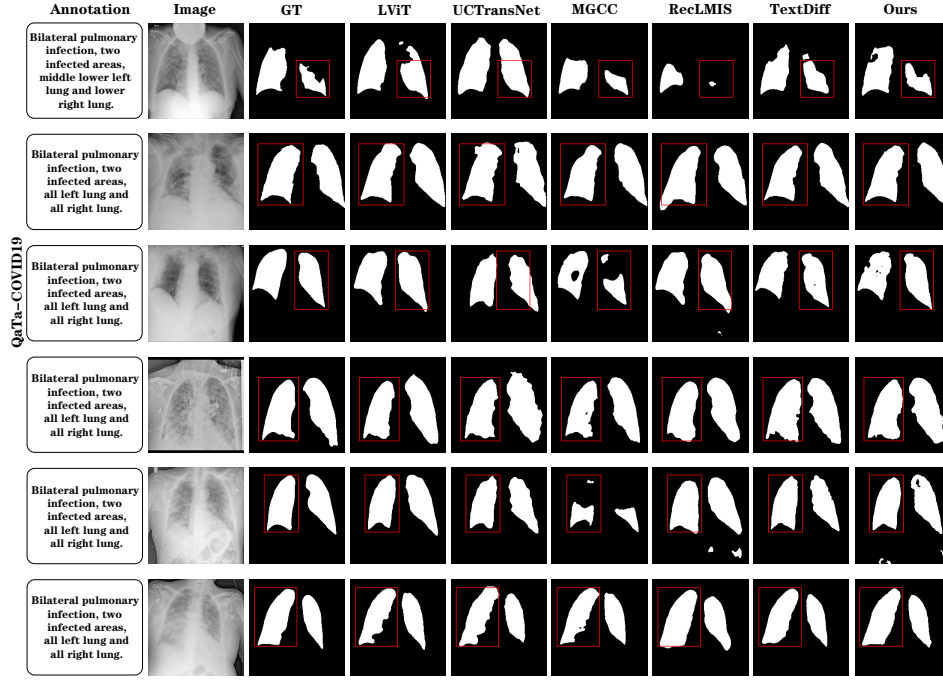

Figure 2: Visual segmentation comparisons with other methods on the QaTa-COVID19 dataset.

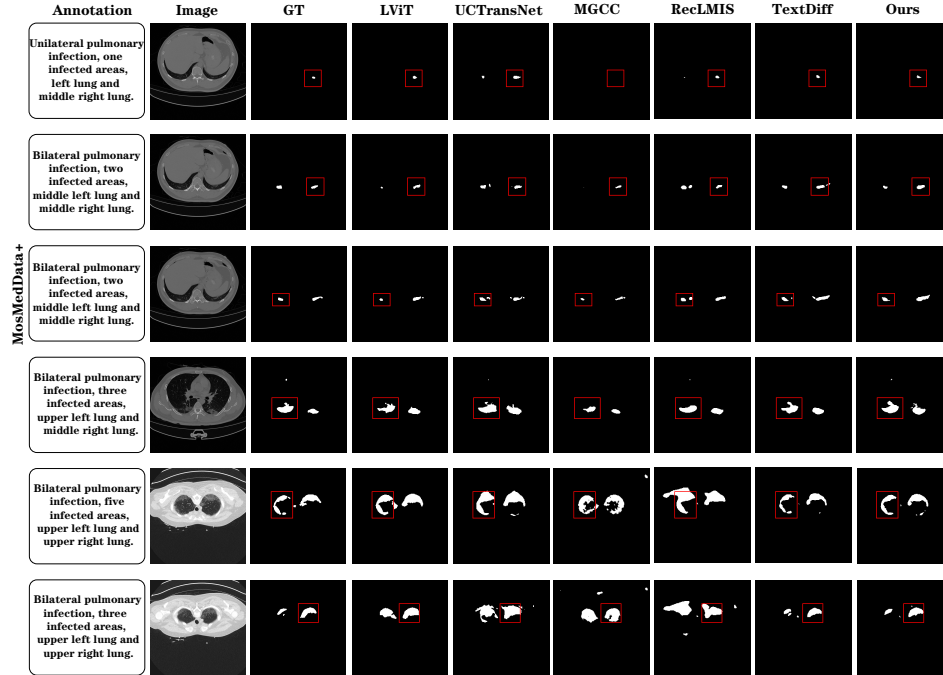

Figure 3: Visual segmentation comparisons with other methods on the MosMedData+ dataset.
